# Supplementary material for: Impact of Climate Change on Three Indicator Galliformes Species in The Northern Highlands of Pakistan
Source: Research Square preprint supplement (doi:10.21203/rs.3.rs-980782/v1), 2022-01-07
Supplement: Supplementary file 1 [file faa4952afe8ad4a5f1881d83.docx]

**Supplementary 1** List of terrestrial protected areas of the NHP included in present study.

| **Province** | **NP** | **GGR** | **CGR** | **PGR** | **WS** |
| --- | --- | --- | --- | --- | --- |
| **AJ&K** | Deva Wattala | Salkhala |  |  | Kalial Bensi |
|  | Ghamoot | Moji |  |  |  |
|  | Machiara | Mohri Said Ali |  |  |  |
|  | Musk Deer | Hillan |  |  |  |
|  | Pir Lasoora | Phala |  |  |  |
|  | Toli Peer | Dhoong Kalla |  |  |  |
|  |  | Banjosa |  |  |  |
|  |  | Qazi Nag |  |  |  |
|  |  | Nar Shair Ali Khan |  |  |  |
|  |  | Sudhan Gali |  |  |  |
|  |  | Janjal Hill |  |  |  |
| **FATA** | **-** | **-** |  |  | - |
| **GB** | Deosai |  |  |  |  |
|  | Karakorum |  |  |  |  |
|  | Khunjrab |  |  |  |  |
|  | Qurumber |  |  |  |  |
|  | Shindoor |  |  |  |  |
| **KPK** | Broghil | Jabbar | Bakhtai | Darbo Kach | Agram Basti |
|  | Chitral GOL | Darmalak | Kareer | Dhok Dheri | Boraka |
|  | Lolosar Dodi Pat | Maroba | Pharhana | Kanra China | Manshi |
|  | Muree Kotli Sattian | Kingar Gali | Rakh Biayan Ahmad Ali Khan | Rakh Saeed Taj Muhammad |  |
|  | Saiful Malook | Marchungi | Jallu | Rakh Sayedan |  |
|  |  | Resi Toi Banda | Sheikh Abad |  |  |
|  |  | Rakh Topi | Manur Valley |  |  |
|  |  | Kachai Marai | Chamnaka |  |  |
|  |  | Sheikhan | Dheri Julagram |  |  |
|  |  | Totalai | Gehret Gol |  |  |
|  |  | Tooshi Gol | Goleen Gol |  |  |
|  |  | Bilyamin | Bhali Ghatti |  |  |
|  |  | Purit and Chinar Gol | Biakand Dara |  |  |
|  |  | Drosh Gol | Ashanr Banr |  |  |
|  |  | Sewagalai | Mandoor |  |  |
|  |  | Nizampur | Gujar Banr |  |  |
|  |  | Shamshtoo | Mankial |  |  |
|  |  | Rakh Sardaran | Lassan Thukrai |  |  |
|  |  | Kamrani | Khawajagan |  |  |
|  |  | Thana Palai | Behali |  |  |
|  |  | Ghorzandi | Malandri |  |  |
|  |  | Dhoda Paya | Phulgaran |  |  |
|  |  | Pind Hashim Khan | Darwazai Banda |  |  |
|  |  | Mang | Sumari Bala |  |  |
|  |  | Kalinjar | Punji |  |  |
|  |  | Bagra | Saji Kot |  |  |
|  |  | Shinawarai | Tooshi Shesha |  |  |
| **Punjab** | Ayub |  |  |  |  |
|  | Kala Chitta |  |  |  |  |
|  | Margalla |  |  |  |  |

**NP = National Park; GGR = Government Game Reserve; CGR = Community Game Reserve; PGR = Private Game Reserve; WS = Wildlife Sanctuary**
